# Supplementary material for: Low degree metabolites explain essential reactions and enhance modularity in biological networks
Source: PubMed Central journal article supplement (PMC1434774; doi:10.1186/1471-2105-7-118), 2006-03-08
Supplement: 1471-2105-7-118-S1.pdf [file 1471-2105-7-118-S1.pdf]

**Additional File 1**  
(Supplementary Tables S1 to S9)

for

“Low degree metabolites explain essential reactions and enhance modularity in biological networks”

by

Areejit Samal, Shalini Singh, Varun Giri, Sandeep Krishna, Nandula Raghuram and Sanjay Jain

**Supplementary Table S1:** List of carbon sources that gave flux vectors with a nonzero growth rate under minimal media for aerobic conditions in the *E. coli* metabolic network (version iJR904; Reed *et. al.* *Genome Biology* 4: R54.1 (2003))

| Abbreviation | Metabolite name                | Abbreviation | Metabolite name          |
|--------------|--------------------------------|--------------|--------------------------|
| 12ppd-S      | (S)-Propane-1,2-diol           | glu-L        | L-Glutamate              |
| 2ddgln       | 2-Dehydro-3-deoxy-D-gluconate  | gly          | Glycine                  |
| 3hcinm       | 3-hydroxycinnamic acid         | glyald       | D-Glyceraldehyde         |
| 3hppn        | 3-(3-hydroxy-phenyl)propionate | glyc         | Glycerol                 |
| 4abut        | 4-Aminobutanoate               | glyc3p       | Glycerol 3-phosphate     |
| ac           | Acetate                        | glyclt       | Glycolate                |
| acac         | Acetoacetate                   | gsn          | Guanosine                |
| acald        | Acetaldehyde                   | hdca         | Hexadecanoate (n-C16:0)  |
| acgam        | N-Acetyl-D-glucosamine         | idon-L       | L-Idonate                |
| acmana       | N-Acetyl-D-mannosamine         | ins          | Inosine                  |
| acnam        | N-Acetylneuraminic acid        | lac-D        | D-Lactate                |
| adn          | Adenosine                      | lac-L        | L-Lactate                |
| akg          | 2-Oxoglutarate                 | lcts         | Lactose                  |
| ala-D        | D-Alanine                      | mal-L        | L-Malate                 |
| ala-L        | L-Alanine                      | malt         | Maltose                  |
| alltn        | Allantoin                      | malthx       | Maltohexaose             |
| arab-L       | L-Arabinose                    | maltpt       | Maltopentaose            |
| arg-L        | L-Arginine                     | malttr       | Maltotriose              |
| asn-L        | L-Asparagine                   | maltttr      | Maltotetraose            |
| asp-L        | L-Aspartate                    | man          | D-Mannose                |
| but          | Butyrate (n-C4:0)              | man6p        | D-Mannose 6-phosphate    |
| cit          | Citrate                        | melib        | Melibiose                |
| cytd         | Cytidine                       | mnl          | D-Mannitol               |
| dad-2        | Deoxyadenosine                 | ocdca        | octadecanoate (n-C18:0)  |
| dcyt         | Deoxycytidine                  | orn          | Ornithine                |
| dgsn         | Deoxyguanosine                 | pppn         | Phenylpropanoate         |
| dha          | Dihydroxyacetone               | pro-L        | L-Proline                |
| din          | Deoxyinosine                   | ptrc         | Putrescine               |
| duri         | Deoxyuridine                   | pyr          | Pyruvate                 |
| etoh         | Ethanol                        | rib-D        | D-Ribose                 |
| fru          | D-Fructose                     | rmn          | L-Rhamnose               |
| fuc-L        | L-Fucose                       | sbt-D        | D-Sorbitol               |
| fum          | Fumarate                       | ser-D        | D-Serine                 |
| g6p          | D-Glucose 6-phosphate          | ser-L        | L-Serine                 |
| gal          | D-Galactose                    | succ         | Succinate                |
| galct-D      | D-Galactarate                  | sucr         | Sucrose                  |
| galctn-D     | D-Galactonate                  | tartr-L      | L-tartrate               |
| galt         | Galactitol                     | thr-L        | L-Threonine              |
| galur        | D-Galacturonate                | tre          | Trehalose                |
| gam          | D-Glucosamine                  | trp-L        | L-Tryptophan             |
| glc-D        | D-Glucose                      | ttdca        | tetradecanoate (n-C14:0) |
| gln          | D-Gluconate                    | uri          | Uridine                  |
| glcr         | D-Glucarate                    | xtsn         | Xanthosine               |
| glcur        | D-Glucuronate                  | xyl-D        | D-Xylose                 |
| gln-L        | L-Glutamine                    |              |                          |

Each carbon source was provided along with ammonium, Fe<sup>2+</sup>, oxygen, phosphate, potassium, proton, sodium, sulfate and water for uptake as part of each minimal growth medium.

**Supplementary Table S2:** List of carbon sources that gave flux vectors with a nonzero growth rate under minimal media for aerobic conditions in the *S. cerevisiae* metabolic network (version iND750; Duarte *et. al.* *Genome Res.* **14**: 1298 (2004))

| Abbreviation | Metabolite name           | Abbreviation | Metabolite name              |
|--------------|---------------------------|--------------|------------------------------|
| 13BDgln      | 1,3-beta-D-Glucan         | glyc         | Glycerol                     |
| 4abut        | 4-Aminobutanoate          | gsn          | Guanosine                    |
| ac           | Acetate                   | ins          | Inosine                      |
| acald        | Acetaldehyde              | mal-L        | L-Malate                     |
| adn          | Adenosine                 | malt         | Maltose                      |
| akg          | 2-Oxoglutarate            | man          | D-Mannose                    |
| ala-L        | L-Alanine                 | melib        | Melibiose                    |
| amet         | S-Adenosyl-L-methionine   | orn          | Ornithine                    |
| arg-L        | L-Arginine                | pap          | Adenosine 3',5'-bisphosphate |
| asn-L        | L-Asparagine              | pro-L        | L-Proline                    |
| asp-L        | L-Aspartate               | pyr          | Pyruvate                     |
| cit          | Citrate                   | rib-D        | D-Ribose                     |
| cytd         | Cytidine                  | sbt-D        | D-Sorbitol                   |
| etoh         | Ethanol                   | ser-L        | L-Serine                     |
| fru          | D-Fructose                | succ         | Succinate                    |
| fum          | Fumarate                  | sucr         | Sucrose                      |
| gal          | D-Galactose               | tre          | Trehalose                    |
| gam6p        | D-Glucosamine 6-phosphate | uri          | Uridine                      |
| glc-D        | D-Glucose                 | xtsn         | Xanthosine                   |
| gln-L        | L-Glutamine               | xyl-D        | D-Xylose                     |
| glu-L        | L-Glutamate               | xylt         | Xylitol                      |
| gly          | Glycine                   |              |                              |

Each carbon source was provided along with ammonium, oxygen, potassium, phosphate, proton, sodium, sulfate and water for uptake as part of each minimal growth medium.

**Supplementary Table S3:** List of carbon sources that gave flux vectors with a non zero growth under minimal media for aerobic conditions in the *S. aureus* metabolic network (version iSB619; Becker and Palsson, *BMC Microbiology* 5: 8 (2005))

| Abbreviation | Metabolite name         | Abbreviation | Metabolite name |
|--------------|-------------------------|--------------|-----------------|
| acgam        | N-Acetyl-D-glucosamine  | lac-D        | D-Lactate       |
| acnam        | N-Acetylneuraminate     | lac-L        | L-Lactate       |
| ala-D        | D-Alanine               | lcts         | Lactose         |
| ala-L        | L-Alanine               | malt         | Maltose         |
| arg-L        | L-Arginine              | man          | D-Mannose       |
| asp-L        | L-Aspartate             | mnl          | D-Mannitol      |
| etoh         | Ethanol                 | orn          | Ornithine       |
| fru          | D-Fructose              | pro-L        | L-Proline       |
| glc-D        | D-Glucose               | rib-D        | D-Ribose        |
| glcn         | D-Gluconate             | ser-L        | L-Serine        |
| glu-L        | L-Glutamate             | sucr         | Sucrose         |
| glyc         | Glycerol                | thr-L        | L-Threonine     |
| glyc3p       | Glycerol 3-phosphate    | tre          | Trehalose       |
| hdca         | Hexadecanoate (n-C16:0) |              |                 |

Each carbon source was provided along with ammonium, Cu<sup>2+</sup>, cytosine, Fe<sup>2+</sup>, Mg, Mn<sup>2+</sup>, Ni<sup>2+</sup>, nicotinate, nitrate, nitrite, oxygen, phosphate, potassium, proton, sodium, sulfate, thiamin, water for uptake as part of each minimal growth medium.

**Supplementary Table S4:** UP(UC) reaction statistics in the original and reduced metabolic networks

| <b>Organism</b>                                                                             | <b><i>E. coli</i></b> | <b><i>S. cerevisiae</i></b> | <b><i>S. aureus</i></b> |
|---------------------------------------------------------------------------------------------|-----------------------|-----------------------------|-------------------------|
| Number of reactions in the original network                                                 | 1176                  | 1579                        | 865                     |
| Number of UP reactions in the original network                                              | 289                   | 391                         | 277                     |
| Number of UC reactions in the original network                                              | 272                   | 370                         | 218                     |
| Number of UP/UC reactions in the original network                                           | 417                   | 583                         | 376                     |
| Number of blocked reactions                                                                 | 290                   | 800                         | 294                     |
| Number of UP/UC reactions in the original network that are blocked                          | 136                   | 386                         | 174                     |
| Number of reactions in the reduced network                                                  | 886                   | 779                         | 571                     |
| Number of UP reactions in the reduced network                                               | 245                   | 218                         | 224                     |
| Number of UC reactions in the reduced network                                               | 245                   | 218                         | 181                     |
| Number of UP/UC reactions in the reduced network                                            | 352                   | 306                         | 276                     |
| Number of UP/UC reactions in the reduced network that are not UP/UC in the original network | 71                    | 109                         | 74                      |

**Supplementary Table S5:** Size distribution of UP-UC clusters in *E. coli* network and its randomized versions. 85 UP-UC clusters of size ranging from 2 to 10 reactions were found in the network; the number of clusters of each size is given in the second column of the table. The third column gives the UP-UC cluster size distribution for randomized networks with same local connectivity as the real network, averaged over 1000 realizations of the randomized network.

| Size of UP-UC cluster | Number of clusters in real network | Number of clusters in randomized networks<br>Mean $\pm$ S.D. |
|-----------------------|------------------------------------|--------------------------------------------------------------|
| 2                     | 49                                 | 101.32 $\pm$ 8.60                                            |
| 3                     | 16                                 | 22.49 $\pm$ 4.28                                             |
| 4                     | 5                                  | 6.62 $\pm$ 2.38                                              |
| 5                     | 7                                  | 2.15 $\pm$ 1.44                                              |
| 6                     | 2                                  | 0.84 $\pm$ 0.89                                              |
| 7                     | 0                                  | 0.34 $\pm$ 0.57                                              |
| 8                     | 2                                  | 0.15 $\pm$ 0.39                                              |
| 9                     | 3                                  | 0.06 $\pm$ 0.24                                              |
| 10                    | 1                                  | 0.02 $\pm$ 0.14                                              |

## Supplementary Table S6: UP-UC clusters of metabolic reactions and the clustering of their genes in operons

The table lists the 85 UP-UC clusters of various sizes in *E. coli* metabolic network, computed as described in the main text. The network used is the one compiled by Reed *et al. Genome Biology* **4**: R54.1 (2003). In the table below, the abbreviations of reactions and metabolites, the description of the metabolic pathway where the reaction occurs, the reaction equation and Gene-Protein-Reaction (GPR) association is taken from the same database. After identifying the gene(s) for each reaction in every cluster using the GPR association, we determined which of the genes associated with a cluster are in the same operon. For a given cluster, genes in the same operon are coloured with the same shade (red, brown or pink). Information about operons was obtained from RegulonDB (Salgado *et al. Nucleic Acid Res.* **32**, D303 (2003)) and Ecocyc (Karp *et al. Nucleic Acid Res.* **30**, 56 (2002)).

Furthermore, we have added information obtained using flux balance analysis as to whether each reaction is 'active' or 'inactive'. Active reactions are those that were found to have a non-zero flux for at least one of the 89 flux vectors each corresponding to a different minimal medium (see main text), and inactive reactions are those that had a zero flux for all the 89 flux vectors. Reactions for which the corresponding gene name was not available in the database have been labelled as NA in the GPR association column. Of these 85 UP-UC clusters, 69 clusters are such that genes are identified for at least two distinct reactions in the cluster. The remaining 16 clusters include (a) 8 clusters that do not have at least two identified genes in the network, and (b) 8 forward and reverse direction pairs of the same reversible reaction. Such clusters are shaded blue. Of the above 69 clusters, 42 show a significant level of coregulation in that two or more genes in the cluster are part of the same operon. Of these 42, 26 are in the active set and 16 are in the inactive set.

### SIZE TWO CLUSTERS

| S. No. | Category | Abbreviation | GPR Association                                                                                  | Description                 | Reaction                                             |
|--------|----------|--------------|--------------------------------------------------------------------------------------------------|-----------------------------|------------------------------------------------------|
| 1      | Active   | BUTCT        | ( b2221 and b2222 )                                                                              | Alternate Carbon Metabolism | accoa + but --> ac + btcoa                           |
| 1      | Active   | FAO4         | ( b3846 and b0221 )                                                                              | Alternate Carbon Metabolism | btcoa + fad + h2o + nad --> aacoa + fadh2 + h + nadh |
| 2      | Active   | GALCTND      | b3692                                                                                            | Alternate Carbon Metabolism | galctn-D --> 2dh3dgal + h2o                          |
| 2      | Active   | DDGALK       | b3693                                                                                            | Alternate Carbon Metabolism | 2dh3dgal + atp --> 2dh3dgal6p + adp + h              |
| 3      | Inactive | FRUK         | b2168                                                                                            | Alternate Carbon Metabolism | atp + f1p --> adp + fdp + h                          |
| 3      | Inactive | FRUpts       | ( b2167 and b2169 and b2415 and b2416 )                                                          | Transport, Extracellular    | fru[e] + pep --> f1p + pyr                           |
| 4      | Active   | DHPPD        | b2541                                                                                            | Alternate Carbon Metabolism | cechddd + nad --> dhpppn + h + nadh                  |
| 4      | Active   | PPPND0       | ( b2538 and b2539 and b2540 and b2542 )                                                          | Alternate Carbon Metabolism | h + nadh + o2 + ppnp --> cechddd + nad               |
| 5      | Inactive | DHCIND       | b2541                                                                                            | Alternate Carbon Metabolism | cenchddd + nad --> dhcinm + h + nadh                 |
| 5      | Inactive | CINND0       | ( b2538 and b2539 and b2540 and b2542 )                                                          | Alternate Carbon Metabolism | cinm + h + nadh + o2 --> cenchddd + nad              |
| 6      | Active   | GALS3        | b4119                                                                                            | Alternate Carbon Metabolism | h2o + melib --> gal + glc-D                          |
| 6      | Active   | MELIBt2      | b4120                                                                                            | Transport, Extracellular    | h[e] + melib[e] --> h + melib                        |
| 7      | Active   | DHCIND0      | b0348                                                                                            | Alternate Carbon Metabolism | dhcinm + o2 --> hkntd                                |
| 7      | Active   | HKNTDH       | b0349                                                                                            | Alternate Carbon Metabolism | h2o + hkntd --> fum + (2) h + op4en                  |
| 8      | Active   | HPPPND0      | b0348                                                                                            | Alternate Carbon Metabolism | dhpppn + o2 --> hkndd                                |
| 8      | Active   | HKND0DH      | b0349                                                                                            | Alternate Carbon Metabolism | h2o + hkndd --> (2) h + op4en + succ                 |
| 9      | Active   | OP4ENH       | b0350                                                                                            | Alternate Carbon Metabolism | h2o + op4en --> 4h2opntn                             |
| 9      | Active   | HOPNTAL      | b0352                                                                                            | Alternate Carbon Metabolism | 4h2opntn --> acald + pyr                             |
| 10     | Inactive | TRE6PP       | b1897                                                                                            | Alternate Carbon Metabolism | h2o + tre6p --> pi + tre                             |
| 10     | Inactive | TREH         | b3519                                                                                            | Alternate Carbon Metabolism | h2o + tre --> (2) glc-D                              |
| 11     | Active   | RBK          | b3752                                                                                            | Alternate Carbon Metabolism | atp + rib-D --> adp + h + r5p                        |
| 11     | Active   | RIBabc       | ( ( b4231 and b4227 and b4228 and b4229 and b4230 ) or ( b3749 and b3751 and b3750 and b3748 ) ) | Transport, Extracellular    | atp + h2o + rib-D[e] --> adp + h + pi + rib-D        |
| 12     | Inactive | KG6PDC       | ( b3581 or b4196 )                                                                               | Alternate Carbon Metabolism | 3dguInp + h --> co2 + xu5p-L                         |
| 12     | Inactive | X5PL3E       | b4197                                                                                            | Alternate Carbon Metabolism | xu5p-L --> ru5p-L                                    |
| 13     | Inactive | TAUDO        | b0368                                                                                            | Alternate Carbon Metabolism | akg + o2 + taur --> aacald + co2 + h + so3 + succ    |
| 13     | Inactive | TAURabc      | ( b0365 and b0366 and b0367 )                                                                    | Transport, Extracellular    | atp + h2o + taur[e] --> adp + h + pi + taur          |

|    |          |         |                                                                                      |                                                    |                                                                                                              |
|----|----------|---------|--------------------------------------------------------------------------------------|----------------------------------------------------|--------------------------------------------------------------------------------------------------------------|
| 14 | Active   | G5SD    | b0243                                                                                | Arginine and Proline Metabolism                    | glu5p + h + nadph --> glu5sa + nadp + pi                                                                     |
| 14 | Active   | GLU5K   | b0242                                                                                | Arginine and Proline Metabolism                    | atp + glu-L --> adp + glu5p                                                                                  |
| 15 | Active   | ARGDC   | ( b2938 or b4117 )                                                                   | Arginine and Proline Metabolism                    | arg-L + h --> agm + co2                                                                                      |
| 15 | Active   | AGMT    | b2937                                                                                | Arginine and Proline Metabolism                    | agm + h2o --> ptrc + urea                                                                                    |
| 16 | Inactive | ETHAAL  | ( b2440 and b2441 )                                                                  | Cell Envelope Biosynthesis                         | etha --> acald + nh4                                                                                         |
| 16 | Inactive | GPDDA2  | b2239                                                                                | Cell Envelope Biosynthesis                         | g3pe + h2o --> etha + glyc3p + h                                                                             |
| 17 | Active   | UHGADA  | b0096                                                                                | Cell Envelope Biosynthesis                         | h2o + u3aga --> ac + u3hga                                                                                   |
| 17 | Active   | U23GAAT | b0179                                                                                | Cell Envelope Biosynthesis                         | 3hmrsACP + u3hga --> ACP + h + u23ga                                                                         |
| 18 | Inactive | EDTXS3  | b2378                                                                                | Cell Envelope Biosynthesis                         | hdeACP + kdo2lipid4 --> ACP + kdo2lipid4p                                                                    |
| 18 | Inactive | EDTXS4  | b1855                                                                                | Cell Envelope Biosynthesis                         | kdo2lipid4p + myrsACP --> ACP + lipa_cold                                                                    |
| 19 | Inactive | G1PTT   | ( b3789 or b2039 )                                                                   | Cell Envelope Biosynthesis                         | dttp + g1p + h --> dtdpglu + ppi                                                                             |
| 19 | Inactive | TDPGDH  | ( b3788 or b2041 )                                                                   | Cell Envelope Biosynthesis                         | dtdpglu --> dtdp4d6dg + h2o                                                                                  |
| 20 | Inactive | TDPDRE  | b2038                                                                                | Cell Envelope Biosynthesis                         | dtdp4d6dg --> dtdp4d6dm                                                                                      |
| 20 | Inactive | TDPDRR  | b2040                                                                                | Cell Envelope Biosynthesis                         | dtdp4d6dm + h + nadph --> dtdprmn + nadp                                                                     |
| 21 | Inactive | GLUCYS  | b2638                                                                                | Cofactor and Prosthetic Group Biosynthesis         | atp + cys-L + glu-L --> adp + glucys + h + pi                                                                |
| 21 | Inactive | GTHS    | b2947                                                                                | Cofactor and Prosthetic Group Biosynthesis         | atp + glucys + gly --> adp + gthrd + h + pi                                                                  |
| 22 | Active   | QULNS   | b0750                                                                                | Cofactor and Prosthetic Group Biosynthesis         | dhap + iasp --> h + (2) h2o + pi + quln                                                                      |
| 22 | Active   | NNDPR   | b0109                                                                                | Cofactor and Prosthetic Group Biosynthesis         | (2) h + prpp + quln --> co2 + nicrnt + ppi                                                                   |
| 23 | Active   | NNAT    | b0639                                                                                | Cofactor and Prosthetic Group Biosynthesis         | atp + h + nicrnt --> dnad + ppi                                                                              |
| 23 | Active   | NADS1   | b1740                                                                                | Cofactor and Prosthetic Group Biosynthesis         | atp + dnad + nh4 --> amp + h + nad + ppi                                                                     |
| 24 | Inactive | PMPK    | b2103                                                                                | Cofactor and Prosthetic Group Biosynthesis         | 4ampm + atp --> 2mahmp + adp                                                                                 |
| 24 | Inactive | TMPPP   | b3993                                                                                | Cofactor and Prosthetic Group Biosynthesis         | 2mahmp + 4mpetz + h --> ppi + thmmp                                                                          |
| 25 | Active   | GLYATi  | b3617                                                                                | Glycine and Serine Metabolism                      | 2aobut + coa --> accoa + gly                                                                                 |
| 25 | Active   | THRD    | b3616                                                                                | Glycine and Serine Metabolism                      | nad + thr-L --> 2aobut + h + nadh                                                                            |
| 26 | Active   | GLCS1   | b3429                                                                                | Glycolysis/Gluconeogenesis                         | adpglc --> adp + glycogen + h                                                                                |
| 26 | Active   | GLGC    | b3430                                                                                | Glycolysis/Gluconeogenesis                         | atp + g1p + h --> adpglc + ppi                                                                               |
| 27 | Active   | FAO3    | ( b3845 and b3846 and b1805 and b0221 )                                              | Membrane Lipid Metabolism                          | atp + (9) coa + (8) fad + (8) h2o + (8) nad + ocdca --> (9) accoa + amp + (8) fadh2 + (8) h + (8) nadh + ppi |
| 27 | Active   | OCDCAi2 | b2344                                                                                | Transport, Extracellular                           | h[e] + ocdca[e] --> h + ocdca                                                                                |
| 28 | Inactive | CYNTAH  | b0340                                                                                | Nitrogen                                           | cynt + (3) h + hco3 --> (2) co2 + nh4                                                                        |
| 28 | Inactive | CYNTt2  | b0341                                                                                | Putative Transporters                              | cynt[e] + h[e] --> cynt + h                                                                                  |
| 29 | Active   | PRFGS   | b2557                                                                                | Purine and Pyrimidine Biosynthesis                 | atp + fgam + gln-L + h2o --> adp + fpram + glu-L + h + pi                                                    |
| 29 | Active   | PRAIS   | b2499                                                                                | Purine and Pyrimidine Biosynthesis                 | atp + fpram --> adp + air + (2) h + pi                                                                       |
| 30 | Inactive | LYSDC   | ( b4131 or b0186 )                                                                   | Threonine and Lysine Metabolism                    | h + lys-L --> 15dap + co2                                                                                    |
| 30 | Inactive | CADVt   | b4132                                                                                | Transport, Extracellular                           | 15dap + h[e] + lys-L[e] --> 15dap[e] + h + lys-L                                                             |
| 31 | Active   | HSK     | b0003                                                                                | Threonine and Lysine Metabolism                    | atp + hom-L --> adp + h + phom                                                                               |
| 31 | Active   | THRS    | b0004                                                                                | Threonine and Lysine Metabolism                    | h2o + phom --> pi + thr-L                                                                                    |
| 32 | Inactive | TSULabc | (( b2425 and b2424 and b2423 and b2422 ) or ( b2424 and b2423 and b2422 and b3917 )) | Transport, Extracellular                           | atp + h2o + tsul[e] --> adp + h + pi + tsul                                                                  |
| 32 | Inactive | CYANST  | b3425                                                                                | Unassigned                                         | cyan + tsul --> h + so3 + tcynt                                                                              |
| 33 | Active   | DHQS    | b3389                                                                                | Tyrosine, Tryptophan, and Phenylalanine Metabolism | 2dda7p --> 3dhq + pi                                                                                         |
| 33 | Active   | DDPA    | ( b2601 or b1704 or b0754 )                                                          | Tyrosine, Tryptophan, and Phenylalanine Metabolism | e4p + h2o + pep --> 2dda7p + pi                                                                              |
| 34 | Active   | ACGS    | b2818                                                                                | Arginine and Proline Metabolism                    | accoa + glu-L --> acglu + coa + h                                                                            |
| 34 | Active   | ACGK    | b3959                                                                                | Arginine and Proline Metabolism                    | acglu + atp --> acg5p + adp                                                                                  |
| 35 | Active   | UAGDP   | b3730                                                                                | Cell Envelope Biosynthesis                         | acgam1p + h + utp --> ppi + uacgam                                                                           |
| 35 | Active   | G1PACT  | b3730                                                                                | Cell Envelope Biosynthesis                         | accoa + gam1p --> acgam1p + coa + h                                                                          |
| 36 | Inactive | GSPMDA  | b2988                                                                                | Arginine and Proline Metabolism                    | gtspm� + h2o --> gthrd + spmđ                                                                                |
| 36 | Inactive | GSPMDS  | b2988                                                                                | Arginine and Proline Metabolism                    | atp + gthrd + spmđ --> adp + gtspmđ + h + pi                                                                 |
| 37 | Inactive | HYP0E   | NA                                                                                   | Cofactor and Prosthetic Group Biosynthesis         | h2o + pyam5p --> pi + pydam                                                                                  |



|    |          |         |                    |                                            |                                             |
|----|----------|---------|--------------------|--------------------------------------------|---------------------------------------------|
| 37 | Inactive | PYDAMK  | b2418              | Cofactor and Prosthetic Group Biosynthesis | atp + pydam --> adp + h + pyam5p            |
| 38 | Inactive | PYDXPP  | NA                 | Cofactor and Prosthetic Group Biosynthesis | h2o + pydx5p --> pi + pydx                  |
| 38 | Inactive | PYDXK   | ( b1636 or b2418 ) | Cofactor and Prosthetic Group Biosynthesis | atp + pydx --> adp + h + pydx5p             |
| 39 | Inactive | PDXPP   | NA                 | Cofactor and Prosthetic Group Biosynthesis | h2o + pdx5p --> pi + pydxn                  |
| 39 | Inactive | PYDXNK  | b2418              | Cofactor and Prosthetic Group Biosynthesis | atp + pydxn --> adp + h + pdx5p             |
| 40 | Inactive | DMATT   | b0421              | Cofactor and Prosthetic Group Biosynthesis | dmpp + ipdp --> grdp + ppi                  |
| 40 | Inactive | GRTT    | b0421              | Cofactor and Prosthetic Group Biosynthesis | grdp + ipdp --> frdp + ppi                  |
| 41 | Active   | PTRCTA  | NA                 | Arginine and Proline Metabolism            | akg + ptrc --> 4abutn + glu-L               |
| 41 | Active   | ABUTD   | NA                 | Arginine and Proline Metabolism            | 4abutn + h2o + nad --> 4abut + (2) h + nadh |
| 42 | Inactive | AMAOTr  | b0774              | Cofactor and Prosthetic Group Biosynthesis | 8aonn + amet --> amob + dann                |
| 42 | Inactive | AMAOTr  | b0774              | Cofactor and Prosthetic Group Biosynthesis | amob + dann --> 8aonn + amet                |
| 43 | Inactive | AOXSr   | b0776              | Cofactor and Prosthetic Group Biosynthesis | ala-L + h + pmcoa --> 8aonn + co2 + coa     |
| 43 | Inactive | AOXSr   | b0776              | Cofactor and Prosthetic Group Biosynthesis | 8aonn + co2 + coa --> ala-L + h + pmcoa     |
| 44 | Inactive | CBIAT   | b1270              | Cofactor and Prosthetic Group Biosynthesis | atp + cbi + h2o --> adocbi + pi + ppi       |
| 44 | Inactive | CBIAT   | b1270              | Cofactor and Prosthetic Group Biosynthesis | adocbi + pi + ppi --> atp + cbi + h2o       |
| 45 | Inactive | GTHOr   | b3500              | Cofactor and Prosthetic Group Biosynthesis | gthox + h + nadph --> (2) gthrd + nadp      |
| 45 | Inactive | GTHOr   | b3500              | Cofactor and Prosthetic Group Biosynthesis | (2) gthrd + nadp --> gthox + h + nadph      |
| 46 | Inactive | ADK4    | b0474              | Nucleotide Salvage Pathways                | amp + itp --> adp + idp                     |
| 46 | Inactive | ADK4    | b0474              | Nucleotide Salvage Pathways                | adp + idp --> amp + itp                     |
| 47 | Inactive | TMDPP   | b4382              | Nucleotide Salvage Pathways                | pi + thymd --> 2dr1p + thym                 |
| 47 | Inactive | TMDPP   | b4382              | Nucleotide Salvage Pathways                | 2dr1p + thym --> pi + thymd                 |
| 48 | Inactive | CRNBCT  | b0038              | Oxidative phosphorylation                  | bbtcoa + crn --> crncoa + gbbtn             |
| 48 | Inactive | CRNBCT  | b0038              | Oxidative phosphorylation                  | crncoa + gbbtn --> bbtcoa + crn             |
| 49 | Inactive | CRNCBCT | b0038              | Oxidative phosphorylation                  | crn + ctbtcoa --> crncoa + ctbt             |
| 49 | Inactive | CRNCBCT | b0038              | Oxidative phosphorylation                  | crncoa + ctbt --> crn + ctbtcoa             |

### SIZE THREE CLUSTERS

| S. No. | Category | Abbreviation | GPR Association                         | Description                     | Reaction                                  |
|--------|----------|--------------|-----------------------------------------|---------------------------------|-------------------------------------------|
| 1      | Active   | FFSD         | NA                                      | Alternate Carbon Metabolism     | h2o + suc6p --> fru + g6p                 |
| 1      | Active   | XYLI2i       | b3565                                   | Alternate Carbon Metabolism     | fru --> glc-D                             |
| 1      | Active   | SUCpts       | ( b2417 and b2415 and b2416 and b2429 ) | Transport, Extracellular        | pep + suc[r]e --> pyr + suc6p             |
| 2      | Active   | MICITD       | ( b1276 or b0118 )                      | Alternate Carbon Metabolism     | 2mcacn + h2o --> micit                    |
| 2      | Active   | MCITS        | b0333                                   | Alternate Carbon Metabolism     | h2o + oaa + ppcoa --> 2mcit + coa + h     |
| 2      | Active   | MCITD        | b0334                                   | Alternate Carbon Metabolism     | 2mcit --> 2mcacn + h2o                    |
| 3      | Inactive | ALDD19x      | b1385                                   | Alternate Carbon Metabolism     | h2o + nad + pacald --> (2) h + nadh + pac |
| 3      | Inactive | PACCOAL      | b1398                                   | Alternate Carbon Metabolism     | atp + coa + pac --> amp + phaccoa + ppi   |
| 3      | Inactive | PEAMNO       | b1386                                   | Alternate Carbon Metabolism     | h2o + o2 + peamn --> h2o2 + nh4 + pacald  |
| 4      | Active   | ACNML        | b3225                                   | Alternate Carbon Metabolism     | acnam --> acmana + pyr                    |
| 4      | Active   | AMANK        | b3222                                   | Putative                        | acmana + atp --> acmanap + adp + h        |
| 4      | Active   | ACNAMt2      | b3224                                   | Transport, Extracellular        | acnam[e] + h[e] --> acnam + h             |
| 5      | Active   | MTRK         | NA                                      | Arginine and Proline Metabolism | 5mtr + atp --> 5mdr1p + adp + h           |
| 5      | Active   | MTAN         | b0159                                   | Arginine and Proline Metabolism | 5mta + h2o --> 5mtr + ade                 |
| 5      | Active   | SPMS         | b0121                                   | Arginine and Proline Metabolism | ametam + ptrc --> 5mta + h + spmd         |
| 6      | Active   | KDOPP        | NA                                      | Cell Envelope Biosynthesis      | h2o + kdo8p --> kdo + pi                  |
| 6      | Active   | KDOPS        | b1215                                   | Cell Envelope Biosynthesis      | ara5p + h2o + pep --> kdo8p + pi          |
| 6      | Active   | KDOCT2       | b0918                                   | Cell Envelope Biosynthesis      | ctp + kdo --> ckdo + ppi                  |
| 7      | Inactive | DHPTDC       | NA                                      | Methionine Metabolism           | dhptd --> h2o + hmfurn                    |
| 7      | Inactive | RHCCE        | b2687                                   | Methionine Metabolism           | rhcys --> dhptd + hcys-L                  |

|    |          |         |                                                                                 |                                            |                                               |
|----|----------|---------|---------------------------------------------------------------------------------|--------------------------------------------|-----------------------------------------------|
| 7  | Inactive | AHCYSNS | b0159                                                                           | Methionine Metabolism                      | ahcys + h2o --> ade + rhcys                   |
| 8  | Active   | HSST    | b4013                                                                           | Methionine Metabolism                      | hom-L + succoa --> coa + suchms               |
| 8  | Active   | SHSL1   | b3939                                                                           | Methionine Metabolism                      | cys-L + suchms --> cyst-L + h + succ          |
| 8  | Active   | CYSTL   | ( b3008 or b1662 )                                                              | Methionine Metabolism                      | cyst-L + h2o --> hcys-L + nh4 + pyr           |
| 9  | Inactive | LGTHL   | b1651                                                                           | Methylglyoxal Metabolism                   | gthrd + mthgxl --> lgt-S                      |
| 9  | Inactive | GLYOX   | b0212                                                                           | Methylglyoxal Metabolism                   | h2o + lgt-S --> gthrd + h + lac-D             |
| 9  | Inactive | MGSA    | b0963                                                                           | Methylglyoxal Metabolism                   | dhap --> mthgxl + pi                          |
| 10 | Active   | UGLYCH  | b0505                                                                           | Nitrogen                                   | (2) h + h2o + urdglyc --> co2 + glx + (2) nh4 |
| 10 | Active   | ALLTN   | b0512                                                                           | Nitrogen                                   | alltn + h2o --> alltt + h                     |
| 10 | Active   | ALLTAH  | b0516                                                                           | Nitrogen                                   | alltt + h2o --> urdglyc + urea                |
| 11 | Active   | DHDPS   | b2478                                                                           | Threonine and Lysine Metabolism            | aspsa + pyr --> 23dhdp + h + (2) h2o          |
| 11 | Active   | DHDPRy  | b0031                                                                           | Threonine and Lysine Metabolism            | 23dhdp + h + nadph --> nadp + thdp            |
| 11 | Active   | THDPS   | b0166                                                                           | Threonine and Lysine Metabolism            | h2o + succoa + thdp --> coa + sl2a6o          |
| 12 | Active   | ACHBS   | ( ( b3670 and b3671 ) or ( b3769 and b3768 and b3767 ) or ( b0077 and b0078 ) ) | Valine, leucine, and isoleucine metabolism | 2obut + h + pyr --> 2ahbut + co2              |
| 12 | Active   | KARA2i  | b3774                                                                           | Valine, leucine, and isoleucine metabolism | 2ahbut + h + nadph --> 23dhmp + nadp          |
| 12 | Active   | DHAD2   | b3771                                                                           | Valine, leucine, and isoleucine metabolism | 23dhmp --> 3mop + h2o                         |
| 13 | Active   | ACLS    | ( ( b3670 and b3671 ) or ( b3769 and b3768 and b3767 ) or ( b0077 and b0078 ) ) | Valine, leucine, and isoleucine metabolism | h + (2) pyr --> alac-S + co2                  |
| 13 | Active   | KARA1i  | b3774                                                                           | Valine, leucine, and isoleucine metabolism | alac-S + h + nadph --> 23dhmb + nadp          |
| 13 | Active   | DHAD1   | b3771                                                                           | Valine, leucine, and isoleucine metabolism | 23dhmb --> 3mob + h2o                         |
| 14 | Active   | LEUTAi  | ( b4054 or b3770 )                                                              | Valine, leucine, and isoleucine metabolism | 4mop + glu-L --> akg + leu-L                  |
| 14 | Active   | IPMD    | b0073                                                                           | Valine, leucine, and isoleucine metabolism | 3c2hmp + nad --> 3c4mop + h + nadh            |
| 14 | Active   | OMCDC   | b0073                                                                           | Valine, leucine, and isoleucine metabolism | 3c4mop + h --> 4mop + co2                     |
| 15 | Active   | PGCD    | b2913                                                                           | Glycine and Serine Metabolism              | 3pg + nad --> 3php + h + nadh                 |
| 15 | Active   | PSP_L   | b4388                                                                           | Glycine and Serine Metabolism              | h2o + pser-L --> pi + ser-L                   |
| 15 | Active   | PSERT   | b0907                                                                           | Glycine and Serine Metabolism              | 3php + glu-L --> akg + pser-L                 |
| 16 | Inactive | SHCHD2  | b3368                                                                           | Cofactor and Prosthetic Group Biosynthesis | nad + shcl --> h + nadh + srch                |
| 16 | Inactive | SHCHF   | b3368                                                                           | Cofactor and Prosthetic Group Biosynthesis | fe2 + srch --> (3) h + sheme                  |
| 16 | Inactive | UPP3MT  | ( b3368 or b3803 )                                                              | Cofactor and Prosthetic Group Biosynthesis | (2) amet + uppg3 --> (2) ahcys + h + shcl     |

#### SIZE FOUR CLUSTERS

| S. No. | Category | Abbreviation | GPR Association     | Description                                | Reaction                                        |
|--------|----------|--------------|---------------------|--------------------------------------------|-------------------------------------------------|
| 1      | Inactive | GDMANE       | b2052               | Cell Envelope Biosynthesis                 | gdpddman --> gdpofuc                            |
| 1      | Inactive | GOFUCR       | b2052               | Cell Envelope Biosynthesis                 | gdpofuc + h + nadph --> gdpfuc + nadp           |
| 1      | Inactive | GMAND        | b2053               | Cell Envelope Biosynthesis                 | gdpmann --> gdpddman + h2o                      |
| 1      | Inactive | MAN1PT2      | b2049               | Cell Envelope Biosynthesis                 | gdp + h + man1p --> gdpmann + pi                |
| 2      | Active   | PMDPHT       | NA                  | Cofactor and Prosthetic Group Biosynthesis | 5aprbu + h2o --> 4r5au + pi                     |
| 2      | Active   | GTPCII2      | b1277               | Cofactor and Prosthetic Group Biosynthesis | gtp + (3) h2o --> 25drapp + for + (2) h + ppi   |
| 2      | Active   | APRAUR       | b0414               | Cofactor and Prosthetic Group Biosynthesis | 5apru + h + nadph --> 5aprbu + nadp             |
| 2      | Active   | DHPPDA2      | b0414               | Cofactor and Prosthetic Group Biosynthesis | 25drapp + h + h2o --> 5apru + nh4               |
| 3      | Active   | MOHMT        | b0134               | Cofactor and Prosthetic Group Biosynthesis | 3mob + h2o + mlthf --> 2dhp + thf               |
| 3      | Active   | PANTS        | b0133               | Cofactor and Prosthetic Group Biosynthesis | ala-B + atp + pant-R --> amp + h + pnto-R + ppi |
| 3      | Active   | ASP1DC       | b0131               | Cofactor and Prosthetic Group Biosynthesis | asp-L + h --> ala-B + co2                       |
| 3      | Active   | DPR          | ( b0425 or b3774 )  | Cofactor and Prosthetic Group Biosynthesis | 2dhp + h + nadph --> nadp + pant-R              |
| 4      | Active   | ADSK         | b2750               | Cysteine Metabolism                        | aps + atp --> adp + h + paps                    |
| 4      | Active   | SADT2        | ( b2751 and b2752 ) | Cysteine Metabolism                        | atp + gtp + h2o + so4 --> aps + gdp + pi + ppi  |
| 4      | Active   | PAPSR        | b2762               | Cysteine Metabolism                        | paps + trdrd --> (2) h + pap + so3 + trdox      |

|   |        |        |                                                                                                 |                                                    |                                           |
|---|--------|--------|-------------------------------------------------------------------------------------------------|----------------------------------------------------|-------------------------------------------|
| 4 | Active | SULabc | (( b2425 and b2422 and b2423 and b2424 ) or ( b2424 and b2422 and b2423 and b2413 and b3917 ) ) | Transport, Extracellular                           | atp + h2o + so4[e] --> adp + h + pi + so4 |
| 5 | Active | PRAli  | b1262                                                                                           | Tyrosine, Tryptophan, and Phenylalanine Metabolism | pran --> 2cpr5p                           |
| 5 | Active | IGPS   | b1262                                                                                           | Tyrosine, Tryptophan, and Phenylalanine Metabolism | 2cpr5p + h --> 3ig3p + co2 + h2o          |
| 5 | Active | ANS    | ( b1263 and b1264 )                                                                             | Tyrosine, Tryptophan, and Phenylalanine Metabolism | chor + gln-L --> anth + glu-L + h + pyr   |
| 5 | Active | ANPRT  | b1263                                                                                           | Tyrosine, Tryptophan, and Phenylalanine Metabolism | anth + prpp --> ppi + pran                |

### SIZE FIVE CLUSTERS

| S. No. | Category | Abbreviation | GPR Association | Description                                | Reaction                                           |
|--------|----------|--------------|-----------------|--------------------------------------------|----------------------------------------------------|
| 1      | Active   | AST          | b1747           | Arginine and Proline Metabolism            | arg-L + succoa --> coa + h + sucarg                |
| 1      | Active   | SOTA         | b1745           | Arginine and Proline Metabolism            | akg + sucom --> glu-L + sucgsa                     |
| 1      | Active   | SADH         | b1748           | Arginine and Proline Metabolism            | (2) h + (2) h2o + sucarg --> co2 + (2) nh4 + sucom |
| 1      | Active   | SGSAD        | b1746           | Arginine and Proline Metabolism            | h2o + nad + sucgsa --> (2) h + nadh + sucglu       |
| 1      | Active   | SGDS         | b1744           | Arginine and Proline Metabolism            | h2o + sucglu --> glu-L + succ                      |
| 2      | Active   | MOAT         | b3633           | Cell Envelope Biosynthesis                 | ckdo + lipidA --> cmp + h + kdolipid4              |
| 2      | Active   | MOAT2        | b3633           | Cell Envelope Biosynthesis                 | ckdo + kdolipid4 --> cmp + h + kdo2lipid4          |
| 2      | Active   | LPADSS       | b0182           | Cell Envelope Biosynthesis                 | lipidX + u23ga --> h + lipidAds + udp              |
| 2      | Active   | TDSK         | b0915           | Cell Envelope Biosynthesis                 | atp + lipidAds --> adp + h + lipidA                |
| 2      | Active   | USHD         | b0480           | Cell Envelope Biosynthesis                 | h2o + u23ga --> (2) h + lipidX + ump               |
| 3      | Active   | PPCDC        | NA              | Cofactor and Prosthetic Group Biosynthesis | 4ppcys + h --> co2 + pan4p                         |
| 3      | Active   | DPCOAK       | NA              | Cofactor and Prosthetic Group Biosynthesis | atp + dpcoa --> adp + coa + h                      |
| 3      | Active   | PPNCL2       | NA              | Cofactor and Prosthetic Group Biosynthesis | 4ppan + ctp + cys-L --> 4ppcys + cmp + h + ppi     |
| 3      | Active   | PNTK         | b3974           | Cofactor and Prosthetic Group Biosynthesis | atp + pnto-R --> 4ppan + adp + h                   |
| 3      | Active   | PTPATi       | b3634           | Cofactor and Prosthetic Group Biosynthesis | atp + h + pan4p --> dpcoa + ppi                    |
| 4      | Inactive | ADOCBLS      | b1992           | Cofactor and Prosthetic Group Biosynthesis | agdpcbi + rdmbzi --> adocbl + gmp + h              |
| 4      | Inactive | NNDMBRT      | b1991           | Cofactor and Prosthetic Group Biosynthesis | dmbzid + nicrnt --> 5prdmzb + h + nac              |
| 4      | Inactive | ADOCBIK      | b1993           | Cofactor and Prosthetic Group Biosynthesis | adocbi + atp --> adocbip + adp + h                 |
| 4      | Inactive | ACBIPGT      | b1993           | Cofactor and Prosthetic Group Biosynthesis | adocbip + gtp + h --> agdpcbi + ppi                |
| 4      | Inactive | RZ5PP        | b0638           | Cofactor and Prosthetic Group Biosynthesis | 5prdmzb + h2o --> pi + rdmbzi                      |
| 5      | Inactive | HEMEOS       | b0428           | Cofactor and Prosthetic Group Biosynthesis | frdp + h2o + pHEME --> hemeO + ppi                 |
| 5      | Inactive | UPPG3        | b3997           | Cofactor and Prosthetic Group Biosynthesis | (4) h + uppg3 --> (4) co2 + cpppg3                 |
| 5      | Inactive | CPPPGO       | b2436           | Cofactor and Prosthetic Group Biosynthesis | cpppg3 + (2) h + o2 --> (2) co2 + (2) h2o + pppg9  |
| 5      | Inactive | PPPGO        | b3850           | Cofactor and Prosthetic Group Biosynthesis | (1.5) o2 + pppg9 --> (3) h2o + ppp9                |
| 5      | Inactive | FCLT         | b0475           | Cofactor and Prosthetic Group Biosynthesis | fe2 + ppp9 --> (2) h + pHEME                       |
| 6      | Inactive | DXPRIi       | b0173           | Cofactor and Prosthetic Group Biosynthesis | dxy15p + h + nadph --> 2me4p + nadp                |
| 6      | Inactive | MECDPDH      | b2515           | Cofactor and Prosthetic Group Biosynthesis | 2mecdp + h --> h2mb4p + h2o                        |
| 6      | Inactive | MEPCT        | b2747           | Cofactor and Prosthetic Group Biosynthesis | 2me4p + ctp + h --> 4c2me + ppi                    |
| 6      | Inactive | CDPMEK       | b1208           | Cofactor and Prosthetic Group Biosynthesis | 4c2me + atp --> 2p4c2me + adp + h                  |
| 6      | Inactive | MECDPS       | b2746           | Cofactor and Prosthetic Group Biosynthesis | 2p4c2me --> 2mecdp + cmp                           |
| 7      | Active   | DB4PS        | b3041           | Cofactor and Prosthetic Group Biosynthesis | ru5p-D --> db4p + for + h                          |
| 7      | Active   | RBFSa        | b1662           | Cofactor and Prosthetic Group Biosynthesis | 4r5au + db4p --> dmlz + (2) h2o + pi               |
| 7      | Active   | RBFK         | b0025           | Cofactor and Prosthetic Group Biosynthesis | atp + ribflv --> adp + fmn + h                     |
| 7      | Active   | FMNAT        | b0025           | Cofactor and Prosthetic Group Biosynthesis | atp + fmn + h --> fad + ppi                        |
| 7      | Active   | RBFSb        | b0415           | Cofactor and Prosthetic Group Biosynthesis | (2) dmlz --> 4r5au + ribflv                        |

### SIZE SIX CLUSTERS

| S. No. | Category | Abbreviation | GPR Association | Description                                | Reaction                                        |
|--------|----------|--------------|-----------------|--------------------------------------------|-------------------------------------------------|
| 1      | Inactive | GLUTRS       | b2400           | Cofactor and Prosthetic Group Biosynthesis | atp + glu-L + trnaglu --> amp + glutrna + ppi   |
| 1      | Inactive | GLUTRR       | b1210           | Cofactor and Prosthetic Group Biosynthesis | glutrna + h + nadph --> glu1sa + nadp + trnaglu |
| 1      | Inactive | PPBNGS       | b0369           | Cofactor and Prosthetic Group Biosynthesis | (2) 5aop --> h + (2) h2o + ppbng                |
| 1      | Inactive | HMBS         | b3805           | Cofactor and Prosthetic Group Biosynthesis | h2o + (4) ppbng --> hmbil + (4) nh4             |
| 1      | Inactive | UPP3S        | b3804           | Cofactor and Prosthetic Group Biosynthesis | hmbil --> h2o + uppg3                           |
| 1      | Inactive | G1SATi       | b0154           | Cofactor and Prosthetic Group Biosynthesis | glu1sa --> 5aop                                 |
| 2      | Inactive | DHNAOT       | b3930           | Cofactor and Prosthetic Group Biosynthesis | dhna + octdp --> 2dmmq8 + co2 + h + ppi         |
| 2      | Inactive | NPHS         | b2262           | Cofactor and Prosthetic Group Biosynthesis | sbzcoa --> coa + dhna                           |
| 2      | Inactive | SUCBZS       | b2261           | Cofactor and Prosthetic Group Biosynthesis | 2shchc --> h2o + sucbz                          |
| 2      | Inactive | OXGDC2       | b2264           | Cofactor and Prosthetic Group Biosynthesis | akg + h + thmpp --> co2 + ssaltpp               |
| 2      | Inactive | SHCHCS2      | b2264           | Cofactor and Prosthetic Group Biosynthesis | ichor + ssaltpp --> 2shchc + pyr + thmpp        |
| 2      | Inactive | SUCBZL       | b2260           | Cofactor and Prosthetic Group Biosynthesis | atp + coa + sucbz --> amp + ppi + sbzcoa        |

### SIZE EIGHT CLUSTERS

| S. No. | Category | Abbreviation | GPR Association                                             | Description                | Reaction                                                                                                            |
|--------|----------|--------------|-------------------------------------------------------------|----------------------------|---------------------------------------------------------------------------------------------------------------------|
| 1      | Inactive | ECAP_EC      | NA                                                          | Cell Envelope Biosynthesis | unagamuf --> eca_EC + h + udcpdp                                                                                    |
| 1      | Inactive | ACGAMT       | b3784                                                       | Cell Envelope Biosynthesis | uacgam + udcpp --> ump + unaga                                                                                      |
| 1      | Inactive | UAG2Ei       | b3786                                                       | Cell Envelope Biosynthesis | uacgam --> uacmam                                                                                                   |
| 1      | Inactive | UACMAMO      | b3787                                                       | Cell Envelope Biosynthesis | h2o + (2) nad + uacmam --> (3) h + (2) nadh + uacmamu                                                               |
| 1      | Inactive | TDPADGAT     | b3790                                                       | Cell Envelope Biosynthesis | accoa + dtdp4addg --> coa + dtdp4aaddg + h                                                                          |
| 1      | Inactive | TDPAGTA      | b3791                                                       | Cell Envelope Biosynthesis | dtdp4d6dg + glu-L --> akg + dtdp4addg                                                                               |
| 1      | Inactive | AADDGT       | b3793                                                       | Cell Envelope Biosynthesis | dtdp4aaddg + unagamu --> dtdp + h + unagamuf                                                                        |
| 1      | Inactive | ACMAMUT      | b3794                                                       | Cell Envelope Biosynthesis | uacmamu + unaga --> h + udp + unagamu                                                                               |
| 2      | Active   | S7PI         | b0222                                                       | Cell Envelope Biosynthesis | s7p --> gmhep7p                                                                                                     |
| 2      | Active   | GMHEPPA      | b0200                                                       | Cell Envelope Biosynthesis | gmhep17bp + h2o --> gmhep1p + pi                                                                                    |
| 2      | Active   | EDTXS1       | b1054                                                       | Cell Envelope Biosynthesis | ddcaACP + kdo2lipid4 --> ACP + kdo2lipid4L                                                                          |
| 2      | Active   | EDTXS2       | b1855                                                       | Cell Envelope Biosynthesis | kdo2lipid4L + myrsACP --> ACP + lipa                                                                                |
| 2      | Active   | AGMHE        | b3619                                                       | Cell Envelope Biosynthesis | adphep-D,D --> adphep-L,D                                                                                           |
| 2      | Active   | GMHEPAT      | b3052                                                       | Cell Envelope Biosynthesis | atp + gmhep1p + h --> adphep-D,D + ppi                                                                              |
| 2      | Active   | GMHEPK       | b3052                                                       | Cell Envelope Biosynthesis | atp + gmhep7p --> adp + gmhep17bp + h                                                                               |
| 2      | Active   | LPSSYN_EC    | ( b3620 and b3621 and b3622 and b3626 and b3627 and b3631 ) | Cell Envelope Biosynthesis | (3) adphep-L,D + (2) cdpea + (3) ckdo + lipa + (2) udpg --> (3) adp + (2) cdp + (3) cmp + (10) h + lps_EC + (2) udp |

### SIZE NINE CLUSTERS

| S. No. | Category | Abbreviation | GPR Association | Description                | Reaction                                       |
|--------|----------|--------------|-----------------|----------------------------|------------------------------------------------|
| 1      | Active   | PPTGS        | NA              | Cell Envelope Biosynthesis | uagmda --> h + peptido_EC + udcpdp             |
| 1      | Active   | PAPPT3       | b0087           | Cell Envelope Biosynthesis | udcpp + ugmda --> uagmda + ump                 |
| 1      | Active   | UAGCVT       | b3189           | Cell Envelope Biosynthesis | pep + uacgam --> pi + uaccg                    |
| 1      | Active   | UAPGR        | b3972           | Cell Envelope Biosynthesis | h + nadph + uaccg --> nadp + uamr              |
| 1      | Active   | UAMAS        | b0091           | Cell Envelope Biosynthesis | ala-L + atp + uamr --> adp + h + pi + uama     |
| 1      | Active   | UAMAGS       | b0088           | Cell Envelope Biosynthesis | atp + glu-D + uama --> adp + h + pi + uamag    |
| 1      | Active   | UAAGDS       | b0085           | Cell Envelope Biosynthesis | 26dap-M + atp + uamag --> adp + h + pi + ugmld |

|   |          |         |                     |                                            |                                                    |
|---|----------|---------|---------------------|--------------------------------------------|----------------------------------------------------|
| 1 | Active   | UGMDDS  | b0086               | Cell Envelope Biosynthesis                 | alaala + atp + ugmd --> adp + h + pi + ugmda       |
| 1 | Active   | UAGPT3  | b0090               | Cell Envelope Biosynthesis                 | uacgam + uagmda --> h + uaagmda + udp              |
| 2 | Inactive | HBZOPT  | b4040               | Cofactor and Prosthetic Group Biosynthesis | 4hbz + octdp --> 3ophb + ppi                       |
| 2 | Inactive | OPHHX   | b3835               | Cofactor and Prosthetic Group Biosynthesis | 2oph + (0.5) o2 --> 2ohph                          |
| 2 | Inactive | CHRPL   | b4039               | Cofactor and Prosthetic Group Biosynthesis | chor --> 4hbz + pyr                                |
| 2 | Inactive | OPHBDC  | ( b3843 or b2311 )  | Cofactor and Prosthetic Group Biosynthesis | 3ophb + h --> 2oph + co2                           |
| 2 | Inactive | OMBZLM  | b3833               | Cofactor and Prosthetic Group Biosynthesis | 2ombzl + amet --> 2ommb1 + ahcys + h               |
| 2 | Inactive | OMMBLHX | b0662               | Cofactor and Prosthetic Group Biosynthesis | 2ommb1 + (0.5) o2 --> 2omhmb1                      |
| 2 | Inactive | OHPHM   | b2232               | Cofactor and Prosthetic Group Biosynthesis | 2ohph + amet --> 2omph + ahcys + h                 |
| 2 | Inactive | DMQMT   | b2232               | Cofactor and Prosthetic Group Biosynthesis | 2omhmb1 + amet --> ahcys + h + q8h2                |
| 2 | Inactive | OMPHHX  | b2907               | Cofactor and Prosthetic Group Biosynthesis | 2omph + (0.5) o2 --> 2ombzl                        |
| 3 | Active   | PRMICli | b2024               | Histidine Metabolism                       | prfp --> prlp                                      |
| 3 | Active   | IGPDH   | b2022               | Histidine Metabolism                       | eig3p --> h2o + imacp                              |
| 3 | Active   | HISTP   | b2022               | Histidine Metabolism                       | h2o + hisp --> histd + pi                          |
| 3 | Active   | HSTPT   | b2021               | Histidine Metabolism                       | glu-L + imacp --> akp + hisp                       |
| 3 | Active   | HISTD   | b2020               | Histidine Metabolism                       | h2o + histd + (2) nad --> (3) h + his-L + (2) nadh |
| 3 | Active   | IG3PS   | ( b2023 and b2025 ) | Histidine Metabolism                       | gln-L + prlp --> aicar + eig3p + glu-L + h         |
| 3 | Active   | ATPPRT  | b2019               | Histidine Metabolism                       | atp + prpp --> ppi + prbatp                        |
| 3 | Active   | PRATPP  | b2026               | Histidine Metabolism                       | h2o + prbatp --> h + ppi + prbamp                  |
| 3 | Active   | PRAMPC  | b2026               | Histidine Metabolism                       | h2o + prbamp --> prfp                              |

### SIZE TEN CLUSTERS

| S. No. | Category | Abbreviation | GPR Association     | Description                                | Reaction                                    |
|--------|----------|--------------|---------------------|--------------------------------------------|---------------------------------------------|
| 1      | Active   | DNMPPA       | NA                  | Cofactor and Prosthetic Group Biosynthesis | dhpmp + h2o --> dhnt + pi                   |
| 1      | Active   | DHNPA2       | b3058               | Cofactor and Prosthetic Group Biosynthesis | dhnt --> 6hmhpt + gcald                     |
| 1      | Active   | DHFS         | b2315               | Cofactor and Prosthetic Group Biosynthesis | atp + dhnt + glu-L --> adp + dhf + pi       |
| 1      | Active   | GTPCI        | b2153               | Cofactor and Prosthetic Group Biosynthesis | gtp + h2o --> ahdt + for                    |
| 1      | Active   | HPPK2        | b0142               | Cofactor and Prosthetic Group Biosynthesis | 6hmhpt + atp --> 6hmhptpp + amp + h         |
| 1      | Active   | DHPS2        | b3177               | Cofactor and Prosthetic Group Biosynthesis | 4abz + 6hmhptpp --> dhnt + h + ppi          |
| 1      | Active   | DNTPPA       | ( b1865 or b0099 )  | Cofactor and Prosthetic Group Biosynthesis | ahdt + h2o --> dhpmp + h + ppi              |
| 1      | Active   | ADCS         | ( b3360 and b1812 ) | Cofactor and Prosthetic Group Biosynthesis | chor + gln-L --> 4adcho + glu-L             |
| 1      | Active   | ADCL         | b1096               | Cofactor and Prosthetic Group Biosynthesis | 4adcho --> 4abz + h + pyr                   |
| 1      | Active   | GCALDD       | b1415               | Folate Metabolism                          | gcald + h2o + nad --> glyclt + (2) h + nadh |

**Supplementary Table S7:** The size distribution of correlated reaction sets (or 'co-sets') in the *E. coli* metabolic network as reported by Reed and Palsson (*Genome Research* **14**:1797-1805 (2004)) and their explanation in terms of UP-UC clusters.

| Size of co-sets | Number of co-sets | Number of co-sets explained by UP-UC clusters | Breakup of explained co-sets into UP-UC clusters in the reduced network |
|-----------------|-------------------|-----------------------------------------------|-------------------------------------------------------------------------|
| 2               | 39                | 22                                            | 22x(2)                                                                  |
| 3               | 12                | 8                                             | 7x(3) + 1x(2)                                                           |
| 4               | 10                | 10                                            | 7x(4) + 2x(3) + 1x(2+2)                                                 |
| 5               | 3                 | 2                                             | 1x(4) + 1x(3+2)                                                         |
| 9               | 2                 | 2                                             | 1x(6+2) + 1x(4+2)                                                       |

The notation used in this table is the same as that in Table 2 of the main text. It is evident from the fourth column that the bulk of reactions in the co-sets are constituted by UP-UC clusters.

We comment here on the similarities and differences between the perfect clusters mentioned in the main text and correlated reaction sets described by Reed and Palsson. Both approaches identify groups of reactions in the network that respond in a 'similar' or correlated fashion across multiple flux vectors. The clusters obtained from them overlap significantly. 58 of the 66 co-sets found by Reed and Palsson either exactly match our perfect clusters or differ from them by one or two reactions.

There are two main differences between the two methods.

First, Reed and Palsson use 'binarized' flux vectors whose entries only carry information about whether a reaction has zero or nonzero flux in a given flux vector. The correlation coefficient we use (given in the Methods section of the main text) has, on the other hand, the actual flux values of the reactions. Thus while the co-sets of Reed and Palsson would cluster together a pair of reactions that are always off together and on together, such a pair would have perfect correlation in our case only if it satisfied the further requirement that the fluxes of the two reactions were proportional to each other across all flux vectors (with the same proportionality constant). In this sense our definition of perfect clusters is tighter than that of co-sets. Thus, for example, reactions O2t, NADH6, CYTBO3, SUCD1i and DKMPPD are part of the same co-set in the case of Reed and Palsson, while they are not perfectly clustered according to our definition.

Second, we have only one flux vector for each feasible minimal medium in aerobic conditions, and hence only 89 flux vectors for *E. coli*, over which to determine the correlation coefficient. On the other hand Reed and Palsson have 56756 flux vectors across 136 growth conditions (88 aerobic and 48 anaerobic conditions). Two reactions that are perfectly correlated across a certain set of flux vectors may not be so if the set is enlarged. If a new flux vector is such that one of the pair has zero flux and the other a nonzero flux in the flux vector, then the pair would not be part of the same co-set. Thus by considering a larger set of flux vectors, Reed and Palsson have obtained a smaller number of co-sets than the number of perfect clusters we have found. Furthermore, clusters found by Reed and Palsson are in most cases subsets of our perfect clusters.

**Supplementary Table S8:** The size distribution of perfect clusters in the *S. cerevisiae* metabolic network and their explanation in terms of UP-UC clusters.

| Size of perfect clusters | Number of perfect clusters | Number of perfect clusters explained | Breakup of explained clusters into UP-UC clusters in the reduced network |
|--------------------------|----------------------------|--------------------------------------|--------------------------------------------------------------------------|
| 2                        | 38                         | 17                                   | 17x(2)                                                                   |
| 3                        | 10                         | 5                                    | 2x(3) + 3x(2)                                                            |
| 4                        | 8                          | 4                                    | 3x(3) + 1x(2)                                                            |
| 5                        | 1                          | 1                                    | 1x(5)                                                                    |
| 6                        | 1                          | 0                                    |                                                                          |
| 7                        | 1                          | 0                                    |                                                                          |
| 8                        | 1                          | 1                                    | 1x(8)                                                                    |
| 9                        | 2                          | 2                                    | 1x(7+2) + 1x(4)                                                          |
| 10                       | 1                          | 0                                    |                                                                          |
| 12                       | 1                          | 1                                    | 1x(4+2)                                                                  |
| 117                      | 1                          | 1                                    | (18+9+7+7+6+6+5+4+3+3+3+3+3+2+2+2+2)                                     |
